## Review Article

# Show me your ID: NLR immune receptors with integrated domains in plants

Clemence Marchal<sup>1,\*</sup>, Vassiliki A. Michalopoulou<sup>2,\*</sup>, Zhou Zou<sup>3</sup>, Volkan Cevik<sup>3</sup> and  Panagiotis F. Sarris<sup>2,4,5</sup>

<sup>1</sup>The Sainsbury Laboratory, University of East Anglia, Norwich Research Park, NR4 7UH, Norwich, United Kingdom; <sup>2</sup>Institute of Molecular Biology and Biotechnology, Foundation for Research and Technology-Hellas, Heraklion 70013, Crete, Greece; <sup>3</sup>Department of Biology and Biochemistry, The Milner Centre for Evolution, University of Bath, Bath BA2 7AY, United Kingdom; <sup>4</sup>Department of Biology, University of Crete, 714 09 Heraklion, Crete, Greece; <sup>5</sup>Department of Biosciences, College of Life and Environmental Sciences, University of Exeter, Exeter, United Kingdom

**Correspondence:** Volkan Cevik (V.Cevik@bath.ac.uk) or Panagiotis F. Sarris (p.sarris@imbb.forth.gr)

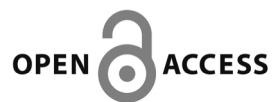

Nucleotide-binding and leucine-rich repeat receptors (NLRs) are intracellular plant immune receptors that recognize pathogen effectors secreted into the plant cell. Canonical NLRs typically contain three conserved domains including a central nucleotide binding (NB-ARC) domain, C-terminal leucine-rich repeats (LRRs) and an N-terminal domain. A subfamily of plant NLRs contain additional noncanonical domain(s) that have potentially evolved from the integration of the effector targets in the canonical NLR structure. These NLRs with extra domains are thus referred to as NLRs with integrated domains (NLR-IDs). Here, we first summarize our current understanding of NLR-ID activation upon effector binding, focusing on the NLR pairs Pik-1/Pik-2, RGA4/RGA5, and RRS1/RPS4. We speculate on their potential oligomerization into resistosomes as it was recently shown for certain canonical plant NLRs. Furthermore, we discuss how our growing understanding of the mode of action of NLR-ID continuously informs engineering approaches to design new resistance specificities in the context of rapidly evolving pathogens.

## Introduction

Plants, unlike mammals, lack an adaptive immune system. Instead, they have evolved two-level innate immunity based on the expression of surface and intracellular receptor proteins [1]. Nucleotide-binding and leucine-rich repeat receptors (NLRs) belong to the second category and recognize secreted pathogens' molecules known as effectors. This recognition often leads to a programmed cell death in plants known as the Hypersensitive Response (HR) to limit pathogen spread in neighboring cells, tissues, and/or organs [1,2]. NLRs are mostly composed of three conserved domains: a central nucleotide-binding (NB-ARC) domain, C-terminal leucine-rich repeats (LRRs), and an N-terminal domain. Based on the nature of this N-terminal domain, NLRs are broadly categorized into three major subgroups: Toll/interleukin-1 receptor (TIR)-NLRs, Coiled-coil (CC)-NLRs, or Resistance to powdery Mildew 8 (RPW8-like)-NLRs [3]. Plant NLRs recognize pathogen effectors through multiple mode of actions, reviewed in [4] and [5]. A recent evolutionary model [6] proposes that NLRs may have evolved from single units able to both detect and respond to the presence of effectors, referred to as singleton NLRs, to functionally specialized units that either detect (sensor NLRs) or execute the response (helper or executor NLRs) to the presence of the pathogen. Sensor and helper NLRs work in pairs (further described below) or in more complex interconnected networks [7–9].

A subcategory of NLRs carry additional noncanonical domain(s) and can make up to 10–15% of the NLRome of a given plant species [10,11]. Functional studies showed that these extra domains were involved in direct or indirect effector recognition [12–16]. Therefore, it was proposed that NLRs with extra noncanonical domains have evolved from the integration of the effector target in the canonical NLR structure [17]. These NLRs are thus commonly referred to as NLR-IDs (NLR with integrated domain(s)).

\*These authors contributed equally to this work.

Received: 28 February 2022  
Revised: 27 April 2022  
Accepted: 03 May 2022

Version of Record published:  
30 September 2022

Kinase, WRKY and zinc-finger BED domains are among the most commonly found IDs [10,11,18,19]. Interestingly, in the case of Pii-2 from rice, the integrated NOI (NO<sub>3</sub>-Induced) domain binds the host protein Exo70-F3, which is a target of the pathogen effector AVR-Pii from *Magnaporthe oryzae* [15]. Pii-2 indirectly recognizes AVR-Pii via Exo70-F3 and it was hypothesized that the original effector target was a NOI-Exo70-F3 complex. Hence, the NOI integration has enabled Pii to monitor *OsExo70-F3* and detect AVR-Pii [15]. Several functionally characterized NLR-IDs work in pair with a canonical NLR, where the NLR-ID is the sensor that recognizes the pathogen effector(s) and the canonical NLR is the executor required for the activation of immune response [12–16]. Another characteristic of these NLR pairs is their close proximity in the genome. The pairs regularly appear in a head-to-head orientation, allowing them to share a common promoter for tight control of their expression. However, not all NLR-IDs have a genetically linked canonical NLR in the genome [20–23]. It is unclear whether such NLR-IDs recognize pathogen effector(s) and activate immune response as singletons, or with the help of a genetically unlinked helper. We show a comprehensive list of all cloned and studied NLR-IDs along with their executors, if known, in Table 1.

In this review, we report on the latest advances in the understanding of NLR-ID mode(s) of action and how it continuously informs NLR-ID engineering. We speculate on the activation mechanisms of NLR-IDs in regard to the recently solved structures of plant NLR resistosomes.

## Current understanding of activation mechanisms of NLR-IDs upon effector recognition

Among all characterized NLR-IDs, three NLR pairs have been extensively studied: the rice CNLs conferring resistance against *M. oryzae* RGA5/RGA4 [16] and Pik-1/Pik-2 [24,25] and the RRS1/RPS4 TNLs from *A. thaliana*, conferring resistance against *R. solanacearum*, *P. syringae* pv. *tomato*, and *C. higginsianum* [26–29]. Hence, we focus our report on these three NLR pairs.

### RGA4/RGA5

RGA4 and RGA5 recognize two sequence-unrelated effectors AVR-Pia and AVR1-CO39 from rice blast pathogen *M. oryzae* [16]. NLR-ID protein RGA5 contains a heavy metal-associated (HMA) domain at the C-terminus after the LRR domain. Interestingly, alternate splicing of RGA5 generates two transcript isoforms that are sequence identical up until the C-terminus where RGA5-A isoform contains the HMA domain, but RGA5-B does not. Only RGA5-A confers resistance to *M. oryzae* isolates expressing AVR-Pia or AVR1-CO39 and interacts with these effectors via its HMA domain [16]. Although AVR-Pia and AVR1-CO39 are sequence-unrelated, they possess highly similar  $\beta$ -sandwich structures that are characteristic of the *M. oryzae* AVRs and ToxB-like (MAX) effector family and bind RGA5<sup>HMA</sup> at the same interface [30–32]. Furthermore, RGA4 and RGA5 interact through their CC domains and form homo- and hetero-dimers [33]. The NLR protein RGA4 triggers effector independent HR when expressed transiently in both rice protoplasts and in *N. benthamiana*. However, this HR is repressed when RGA4 is co-expressed with RGA5. The present study suggests that upon direct interaction of the effector protein AVR-Pia with the HMA domain in RGA5, repression mediated by RGA5 on RGA4 is relieved and HR occurs [33].

### Pik-1/Pik-2

The NLR pair Pik-1 and Pik-2 from rice confers resistance to *M. oryzae* following recognition of the effector protein AVR-Pik [25,34,35]. Allelic series were described for both the NLR pair and the effector with Pik alleles showing different recognition specificities to AVR-Pik variants [36–38]. Similar to RGA5, Pik-1 contains an HMA domain but located between CC and NB-ARC domains. Pik-1- and Pik-2-mediated immune activation occurs following direct interaction of AVR-Pik with the HMA domain in Pik-1 [14,38]. AVR-Pik effector proteins share the same MAX fold as AVR-Pia and AVR1-CO39. However, the binding interface of Pikp-1<sup>HMA</sup>/AVR-PikD is different from that of RGA5<sup>HMA</sup>/AVR-Pia or AVR1-CO39 [14,38]. Additionally, a tripartite complex involving Pikp-1, Pikp-2, and AVR-PikD is formed upon effector binding to Pikp-1. This finding suggests a receptors cooperation for the Pikp-1/Pikp-2 pair, rather than a negative regulation as it was reported for the RGA4/RGA5 pair [39]. However, how RGA4 or Pik-2 activates immunity and triggers cell death is only partially understood.

### RRS1/RPS4

Studies involving *A. thaliana* RRS1/RPS4 immune receptors pair provide further insights into the immune activation by NLR/NLR-ID pairs. RRS1 and RPS4 confer resistance to the bacterial pathogens *P. syringae* and *R. solanacearum* through the recognition of the effectors AvrRps4 and PopP2, respectively [12,13,29,40,41]. In *A. thaliana*, two different RRS1 alleles show different recognition specificities. RRS1-S (in ecotype Col-0) recognizes AvrRps4 but not

**Table 1 A comprehensive list of all cloned and studied NLR-IDs to date, along with their executor NLR and pathogen resistance, where these are known**

| NLR-ID       | Type             | ID code                       | Host species                                    | Integrated domain                                     | Executor NLR      | ID code            | Resistance                                                                                                                 | Citation  |
|--------------|------------------|-------------------------------|-------------------------------------------------|-------------------------------------------------------|-------------------|--------------------|----------------------------------------------------------------------------------------------------------------------------|-----------|
| Adnr1        | CNL              | TraesCS5A02G344100            | <i>Triticum aestivum</i> cv. Chinese spring     | ANK, WRKY                                             | Adnr1-RGA4 (?)    | TraesCS5A02G344000 | <i>Diuraphis noxia</i>                                                                                                     | [83]      |
| BnRPR1       | TNL              | NA                            | <i>Brassica napus</i>                           | B3, TFSIIN                                            | BnRPR2            | NA                 | NA                                                                                                                         | [84]      |
| CHS3         | TNL              | NP_197291                     | <i>Arabidopsis thaliana</i> ecotype Col-0       | LIM, DA1-like domain                                  | CSA1              | NP_197290          | NA                                                                                                                         | [85,86]   |
| DAR5         | RPW8-like        | NP_201464                     | <i>A. thaliana</i> ecotype Col-0                | LIM, DA1-like domain                                  | NA                | -                  | NA                                                                                                                         | [87]      |
| OsRPR1       | CNL              | OsJ_34782                     | <i>Oryza sativa Japonica</i> group              | WRKY (x2)                                             | OsRPR2            | OsJ_34781          | NA                                                                                                                         | [88]      |
| Pi1-5        | CNL              | AEB00617                      | <i>Oryza sativa Indica</i> group (C101LAC)      | AAA                                                   | NA                | -                  | <i>M. oryzae</i>                                                                                                           | [89]      |
| Pi5-3        | CNL              | Os09g15850                    | <i>O. sativa Japonica</i> Group cv. Nipponbare  | Apoptotic protease-activating factors, helical domain | Pi5-1             | Os09g15840         | NA                                                                                                                         | [90]      |
| Pi7-J-1      | CNL              | ASM94220                      | <i>O. sativa Indica</i> group (cv. Jao Hom Nin) | AAA                                                   | Pish-J            | KY225901.1         | <i>M. oryzae</i>                                                                                                           | [91]      |
| Pia-2 (RGA5) | CNL              | AB604627                      | <i>O. sativa Japonica</i> Group cv. Sasanishiki | HMA-like                                              | Pia-1 (RGA4)      | AB604622.1         | <i>M. oryzae</i>                                                                                                           | [34]      |
| Pii-2        | CNL              | QDZ58247                      | <i>O. sativa Japonica</i> Group                 | NOI                                                   | Pii-1             | BAN59294           | <i>M. oryzae</i>                                                                                                           | [92]      |
| Pik-1        | CNL              | ADZ48537                      | <i>O. sativa Japonica</i> Group                 | AAA, HMA-like (Uniprot)                               | Pik-2             | P0D007.1           | <i>M. oryzae</i>                                                                                                           | [93]      |
| Pike-1       | CNL              | NA                            | <i>O. sativa Indica</i> group (C101LAC)         | CtNL                                                  | Pike-2            | NA                 | <i>M. oryzae</i>                                                                                                           | [94]      |
| Pik-h1       | CNL              | AET36549                      | <i>O. sativa Japonica</i> Group                 | AAA                                                   | Pik-h2            | AET36550           | <i>M. oryzae</i>                                                                                                           | [95]      |
| Pik-m1       | CNL              | AB462324                      | <i>O. sativa Japonica</i> Group cv. Tsuyuake    | HMA-like (Uniprot)                                    | Pik-m2            | D5L9H7             | <i>M. oryzae</i>                                                                                                           | [96]      |
| Pik-p1       | CNL              | ADV58352                      | <i>O. sativa Japonica</i> Group                 | AAA                                                   | Pik-p2            | ADV58351           | <i>M. oryzae</i>                                                                                                           | [24]      |
| Pik-s1       | CNL              | AET36547                      | <i>O. sativa Japonica</i> Group                 | HMA-like                                              | Pik-s2            | AET36547           | <i>M. oryzae</i>                                                                                                           | [97]      |
| PiPR1        | CNL              | XM_015780628                  | <i>O. sativa Japonica</i> Group cv. Nipponbare  | ZnF_BED                                               | NA                | -                  | <i>M. oryzae</i>                                                                                                           | [98]      |
| Pi-ta        | CNL              | ACX94088                      | <i>O. sativa Japonica</i> group                 | Thioredoxin                                           | NA                | -                  | <i>M. oryzae</i>                                                                                                           | [99]      |
| RGA2a        | CNL              | AGQ17376                      | <i>Aegilops tauschii</i>                        | EXO70                                                 | RGA1e             | AGQ17384           | -                                                                                                                          | [100]     |
| RGH2         | CNL              | NA                            | <i>Hordeum vulgare</i> subsp. <i>vulgare</i>    | EXO70                                                 | RGH3              | NA                 | <i>Blumeria graminis</i> f. sp. <i>hordei</i>                                                                              | [101]     |
| RLM3.Col     | TNL              | NM_001341182                  | <i>A. thaliana</i> ecotype Col-0                | BRX (3x)                                              | NA                | -                  | <i>Leptosphaeria maculans</i> , <i>Alternaria brassicicola</i> , <i>Alternaria brassicae</i> , and <i>Botrytis cinerea</i> | [102]     |
| RPG1         | CNL              | Q8L3P8                        | <i>H. vulgare</i> subsp. <i>vulgare</i>         | Pseudokinase domain (pK1), active kinase domain (pK2) | NA                | -                  | <i>Puccinia graminis</i> f. sp. <i>tritici</i>                                                                             | [103]     |
| RPG5         | CNL              | ACH69774                      | <i>H. vulgare</i> subsp. <i>vulgare</i>         | Serine/Threonine protein kinase                       | RGA1, RPG4 (Adf2) | ACH69773, ACH69772 | <i>P. graminis</i> f. sp. <i>tritici</i>                                                                                   | [104,105] |
| Rph15        | CNL              | KAE8770059                    | <i>H. vulgare</i> subsp. <i>spontaneum</i>      | ZnF_BED                                               | NA                | -                  | <i>Puccinia hordei</i>                                                                                                     | [106]     |
| Rpp1-R1      | ONL <sup>a</sup> | PRGDB240989 (Glyma.18G280300) | <i>Glycine max</i>                              | ULP1 protease                                         | NA                | -                  | <i>Phakopsora pachyrhizi</i>                                                                                               | [107]     |
| Rpp1-R3      | ONL <sup>a</sup> | PRGDB236486 (Glyma.18G281500) | <i>G. max</i>                                   | ULP1 protease                                         | NA                | -                  | <i>P. pachyrhizi</i>                                                                                                       | [107]     |

Downloaded from http://port.oxfordjournals.org/ by guest on 20 April 2024

Continued over

**Table 1** A comprehensive list of all cloned and studied NLR-IDs to date, along with their executor NLR and pathogen resistance, where these are known (Continued)

| NLR-ID          | Type             | ID code                          | Host species                                                | Integrated domain                               | Executor NLR  | ID code      | Resistance                                                                          | Citation |
|-----------------|------------------|----------------------------------|-------------------------------------------------------------|-------------------------------------------------|---------------|--------------|-------------------------------------------------------------------------------------|----------|
| Rpp1-R4         | ONL <sup>a</sup> | PRGDB236494<br>(Glyma.18G281600) | <i>G. max</i>                                               | ULP1 protease                                   | NA            | -            | <i>P. pachyrhizi</i>                                                                | [107]    |
| Rpp1-R5         | ONL <sup>a</sup> | PRGDB236455<br>(Glyma.18G281700) | <i>G. max</i>                                               | ULP1 protease                                   | NA            | -            | <i>P. pachyrhizi</i>                                                                | [107]    |
| RPP2A           | TNL              | NP_193685                        | <i>A. thaliana</i> ecotype Col-0                            | AAA (2x)                                        | RPP2B         | NP_001328446 | <i>Hyaloperonospora arabidopsidis</i>                                               | [108]    |
| RRS1B           | TNL              | NM_180802                        | <i>A. thaliana</i> ecotype Col-0                            | WRKY                                            | RPS4B         | NP_001330960 | <i>Pseudomonas syringae</i>                                                         | [42]     |
| RRS1-R          | TNL              | HQ170631                         | <i>A. thaliana</i> ecotype Nd-1                             | WRKY                                            | RPS4          | NP_199338    | <i>P. syringae</i> ,<br><i>Ralstonia solanacearum</i>                               | [109]    |
| RRS1-S          | TNL              | NM_123894                        | <i>A. thaliana</i> ecotype Col-0                            | WRKY                                            | RPS4          | NP_199338    | <i>P. syringae</i>                                                                  | [109]    |
| RRS1-Ws         | TNL              | AB470471.1                       | <i>A. thaliana</i> ecotype Ws-0                             | WRKY                                            | RPS4-Ws       | AB470473.1   | <i>P. syringae</i> , <i>R. solanacearum</i> ,<br><i>Colletotrichum higginsianum</i> | [110]    |
| SLH1            | TNL              | BAD38678                         | <i>A. thaliana</i> ecotype No-1                             | WRKY                                            | RPS4          | NP_199338    | <i>P. syringae</i> , <i>R. solanacearum</i>                                         | [111]    |
| Ta4ANPR1        | ONL <sup>a</sup> | NA                               | <i>T. aestivum</i> cv. Chinese spring                       | HTH (x2), BTB, ANK (x2), NPR1 <sub>like_C</sub> | Ta4ANPR1-RGA4 | NA           | <i>P. graminis</i> f. sp. <i>tritici</i>                                            | [112]    |
| Ta7ANPR1 (RGA5) | ONL <sup>a</sup> | NA                               | <i>T. aestivum</i> cv. Chinese spring                       | HTH (x2), BTB, ANK (x2), NPR1 <sub>like_C</sub> | Ta7ANPR1-RGA4 | NA           | <i>P. graminis</i> f. sp. <i>tritici</i>                                            | [112]    |
| Ta7DNPR1        | ONL <sup>a</sup> | NA                               | <i>T. aestivum</i> cv. Chinese spring                       | HTH (x2), BTB, ANK (x2), NPR1 <sub>like_C</sub> | Ta7DNPR1-RGA4 | NA           | <i>P. graminis</i> f. sp. <i>tritici</i>                                            | [112]    |
| TRIDC5AG050380  | CNL              | TRIDC5AG050380                   | <i>Triticum dicoccoides</i>                                 | ANK, WRKY                                       | NA            | -            | <i>Puccinia striiformis</i> f. sp. <i>tritici</i>                                   | [21]     |
| Tsn1            | CNL              | ADH59425                         | <i>Triticum turgidum</i> subsp. <i>durum</i>                | Pkinase                                         | NA            | -            | <i>Parastagonospora nodorum</i> ,<br><i>Pyrenophora tritici-repentis</i>            | [113]    |
| WRKY19          | TNL              | NM_001125496                     | <i>A. thaliana</i> ecotype Col-0                            | PAH, WRKY (2x), MAPK                            | DSC1          | NP_192938    | <i>Meloidogyne incognita</i>                                                        | [114]    |
| Xa1             | CNL              | AB002266                         | <i>O. sativa</i> <i>Indica</i> group (strain IR-BB1)        | ZnF <sub>2</sub> -BED                           | NA            | -            | <i>Xanthomonas oryzae</i> pv. <i>oryzae</i>                                         | [115]    |
| Xo1             | CNL              | NA                               | <i>Oryza sativa</i> Aromatic Group cv. Carolina Gold Select | ZnF <sub>2</sub> -BED                           | NA            | -            | <i>X. oryzae</i> pv. <i>oryzae</i>   <i>X. oryzae</i> pv. <i>oryzicola</i>          | [23,116] |
| Yr5             | CNL              | QEQ12705                         | <i>T. aestivum</i>                                          | ZnF <sub>2</sub> -BED                           | NA            | -            | <i>P. striiformis</i> f. sp. <i>tritici</i>                                         | [117]    |
| Yr7             | CNL              | QEQ12704                         | <i>T. aestivum</i>                                          | ZnF <sub>2</sub> -BED                           | NA            | -            | <i>P. striiformis</i> f. sp. <i>tritici</i>                                         | [117]    |
| YrSP            | CNL              | QEQ12706                         | <i>T. aestivum</i>                                          | ZnF <sub>2</sub> -BED                           | NA            | -            | <i>P. striiformis</i> f. sp. <i>tritici</i>                                         | [117]    |
| YrU1            | CNL              | QIM55694                         | <i>Triticum urartu</i>                                      | ANK, WRKY                                       | NA            | -            | <i>P. striiformis</i> f. sp. <i>tritici</i>                                         | [21]     |

Most of the NLR-IDs presented in this list have been attached from RefPlantNLR [82].

<sup>a</sup>Stands for 'Other'-NL. For NLRs without a CC or TIR domain but a noncanonical domain integrated at their N-terminus (based on RefplantNLR nomenclature [82]).

PopP2, while RRS1-R (in ecotype Ws-2) can recognize both AvrRps4 and PopP2. RPS4 is a canonical TNL type of resistance protein, while RRS1-R is a TNL protein with an integrated WRKY-like domain near its C-terminus. Interestingly, there is a paralogous RPS4B/RRS1B pair in *A. thaliana* (ecotype Ws-2) that also recognizes AvrRps4 but not PopP2. The WRKY domains of RRS1 and RRS1B phylogenetically cluster with different WRKY groups, suggesting an independent integration event [42].

Effector recognition occurs by direct binding of structurally distinct AvrRps4 or PopP2 effectors to the integrated WRKY-like domain [12,13]. The structures of the WRKY-like domain of RRS1 in complex with AvrRps4 or PopP2 indicate that the effectors share a similar binding interface to this ID domain that involves the WRKYGQK DNA-binding motif [43,44]. Additionally, AvrRps4 and *At*WRKY41, a host WRKY transcription factor, share the same binding interface as RRS1<sup>WRKY</sup>/AvrRps4 or PopP2 and effector binding reduces the DNA-binding activity of *At*WRKY41 [43]. This suggests that AvrRps4 promotes virulence via sterically blocking DNA binding of WRKY TFs. Deletion of RRS1-R<sup>WRKY</sup> triggers a constitutive RPS4-dependent immune activation, suggesting that the RRS1-R<sup>WRKY</sup> maintains the complex in an inactive state [45]. Intramolecular interactions between the WRKY-like domain and its adjacent domain (named DOM4) are disrupted by AvrRps4 effector binding, which de-represses the complex and leads to an immune response activation [45]. PopP2-mediated de-repression of RRS1-R/RPS4 immune complex is likely different and requires the longer C-terminal extension that is present in RRS1-R but not in RRS1-S [45].

Furthermore, multiple sites within the region harboring C-terminal and the WRKY-like domains of RRS1-R but not RRS1-S are phosphorylated [46]. Phosphorylation occurring at Thr1214 is essential to keep the RRS1-R/RPS4 immune complex at repressed state, while dephosphorylation might release this autoinhibition. Interestingly, the same phosphorylation site is acetylated by PopP2, which might prevent phosphorylation and thus activate the complex [46]. PopP2 but not AvrRps4 responsiveness requires phosphorylation at other sites within the C-terminal region of RRS1-R. De-repression of RRS1-R and RRS1-S by effector binding also triggers proximity between their TIR domains and C termini, releasing RPS4<sup>TIR</sup> from RRS1<sup>TIR</sup> inhibition [46]. This could lead to self-association-mediated nicotinamide adenine dinucleotide (NAD<sup>+</sup>) hydrolase (NADase) activity of the executor RPS4 and activation of downstream immune signalling, as shown for two singleton TNL immune receptors RPP1 and ROQ1 [47,48]. Finally, recent work suggests that there is an extra layer of complexity in the interaction between RRS1-R and RPS4 [49]. The authors showed that RRS1-R enhances the HR mediated by several autoactive RPS4 alleles, but not RRS1-S. Additional biochemical and structural studies will be required to characterize the effect of the RPS4 mutations on its interaction with RRS1 alleles.

## Different sensor/executor interactions for different NLR pairs

P-loop (Walker-A) and MHD motifs associated with the NB-ARC domain contribute to NLR activation [50,51]. Although RRS1 and RGA5 both contain a canonical NB-ARC, their p-loop motif is not required for immune response signalling. The same motif, however, is essential for the function of their executors RPS4 and RGA4, respectively [33,45]. This is different from what was observed for Pk1p-1 and Pk1p-2 receptors, where the p-loop and MHD motifs were required in both sensor and executor for the HR induction in *N. benthamiana* [39]. With the recent demonstration that plant NLRs oligomerize upon activation to form resistosomes [47,48,52,53] that are similar to mammalian inflammasomes [54–57], it would be interesting to see how paired NLRs and NLR-IDs in general fit this model. Are both sensor and executor part of the resistosome? Does the sensor activate/release the executor, which then forms a resistosome? The plant NLR-ID/NLR pairs may function similarly to the mammalian NLRC4/NAIP5 pair that forms a specific inflammasome structure [58,59]. In the plant pairs the sensor NLR-ID interacts with an elicitor (effector), similarly to NAIP5 sensor that interacts with the bacterial flagellin, while the executor NLR is activated (as the NLRC4) and both could potentially form an activated resistosome. Additionally, an activated resistosome containing sensor/executor poly-heterodimers may occur, given that many NLR pairs associate even in the absence of the effector. Alternatively, in the cases where the NLR-ID is not paired, the singleton could be activated by recognizing an elicitor via its ID and form a homo-oligomerized resistosome complex or co-operate with another NLR from a distant genetic locus. A detailed speculation of the formation of such resistosomes in plants is shown in Figure 1. However, these hypotheses remain to be investigated using state of the art structural biology approaches and genetics. Many NLR-IDs have been identified to date (Table 1) and elucidating how effector recognition and activation occur might uncover new mechanisms for this wide NLR subfamily.

## IDs as targets for NLR engineering

Plant pathogens rapidly evolve virulent races that can nullify new resistance specificities shortly after being deployed in the field. To address this, we need to continuously identify new resistance genes and alleles targeting the pathogen genotypes associated with plant disease outbreaks and transfer these into commercial elite cultivars in a timely fashion. With our growing understanding of NLR mode of action, fine-tuning resistance mediated by characterized NLRs and adapting it to current epidemics might become possible. Recent work showed that engineering new resistance specificities in NLR-IDs is achievable, although it involves considerable prior knowledge of the system. The two main avenues for engineering IDs in NLR-IDs are mutagenesis or domain shuffling (Table 2 and Figure 2).

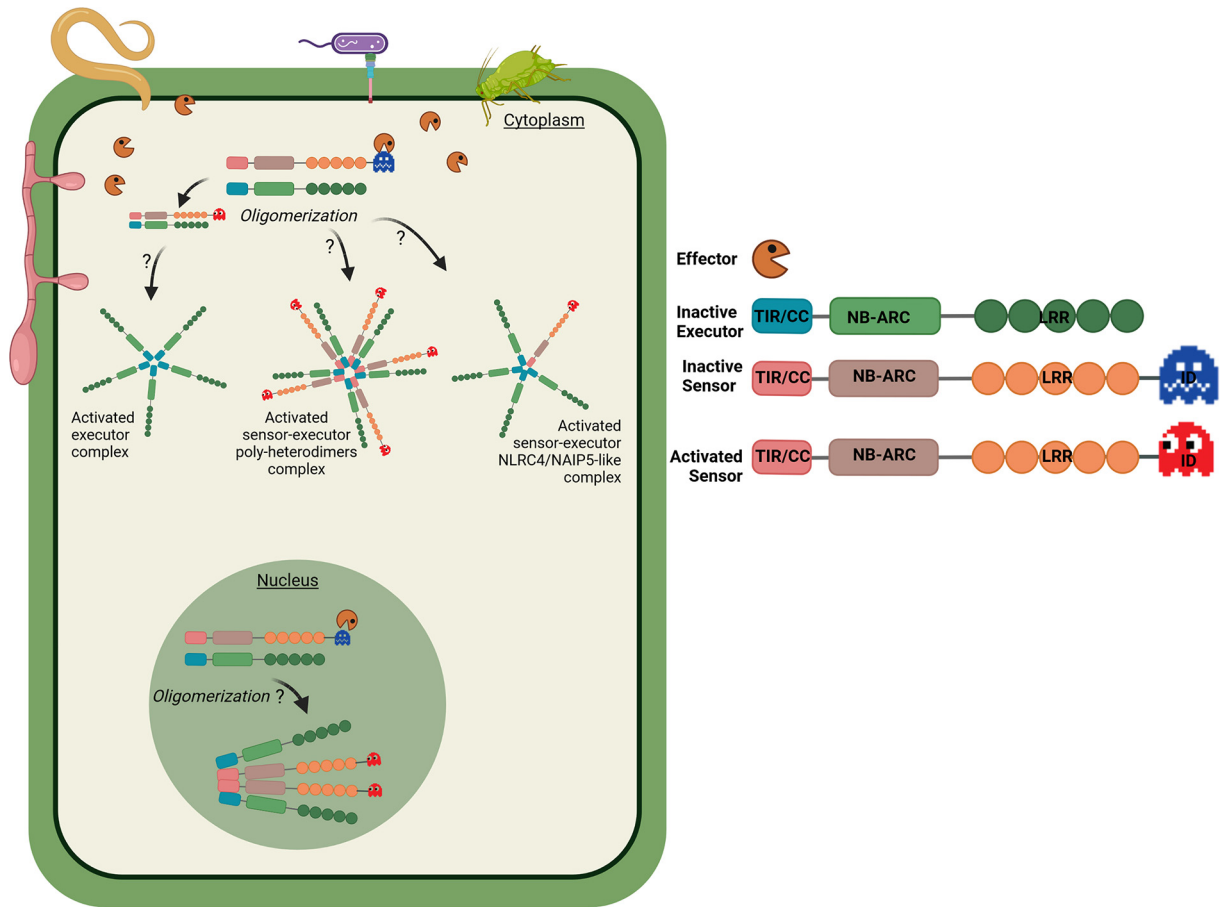

**Figure 1. NLR-ID/NLR pair activation model**

Pathogens such as bacteria, oomycetes, fungi, nematodes, or insects secrete effectors into the plant cytoplasm. The interaction of the effectors with the ID of the sensor NLR, either directly or indirectly, leads to the activation of the sensor and the executor NLRs in the cytoplasm or nucleus. We propose that the activation of the NLR pairs is accompanied with oligomerization of either the executor only, or of the sensor-executor heterodimers or of the sensor-executor in a NLR4/NAIP5-like complex. The NLR oligomers may vary depending on the nature of the NLR pair. Some NLR pairs may also self-associate in resting stage before their activation by an effector (e.g., Pik-1/Pik-2). Created in BioRender.com.

**Table 2 Examples of NLR-ID engineering with corresponding targets and outcomes**

| System        | Cognate effector(s) | New target(s)  | Methods                      | Gain of binding | HR in <i>N. benthamiana</i> | Resistance in stable lines |
|---------------|---------------------|----------------|------------------------------|-----------------|-----------------------------|----------------------------|
| Pikp-1/Pikp-2 | AVR-PikD            | AVR-PikD,E,A,C | Structure-guided mutagenesis | Y               | Y (not for AVR-PikC)        | Not tested                 |
| RGA5/RGA4     | AVR1-CO39, AVR-Pia  | AVR-PikD       | Structure-guided mutagenesis | Y               | Y                           | N                          |
| RGA5/RGA4     | AVR1-CO39, AVR-Pia  | AVR-Pib        | Structure-guided mutagenesis | Y               | Y                           | Y                          |
| RRS1-R/RPS4   | PopP2, AvrRps4      | SAP05          | Domain shuffling             | Y               | Y                           | N                          |
| Pikm-1/Pikm-2 | AVR-PikD,E,A        | GFP, mCherry   | Domain shuffling             | Not tested      | Y                           | Not tested                 |

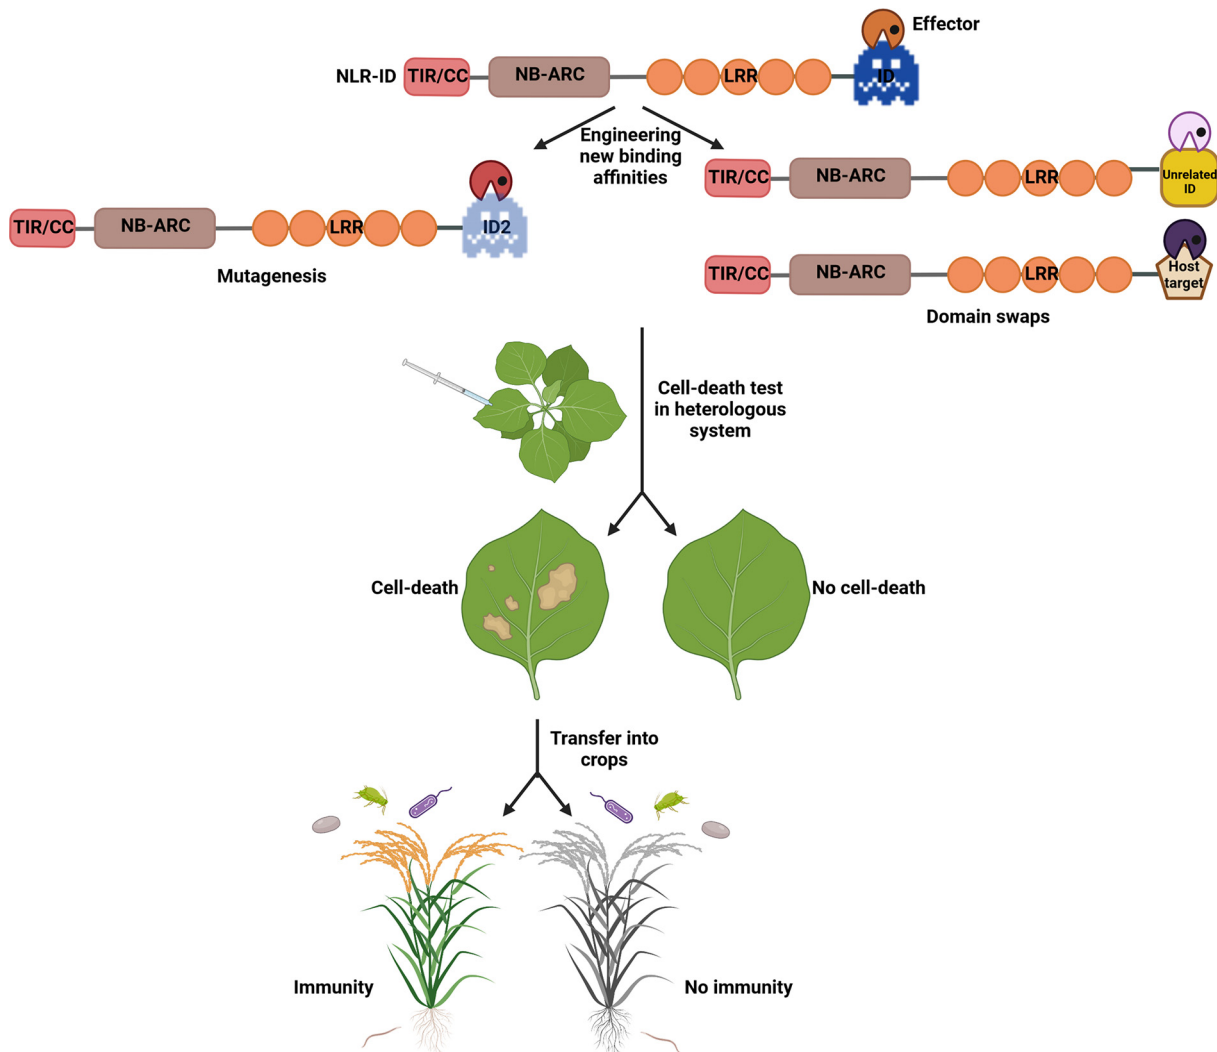

**Figure 2. Pipeline to engineer new resistance specificities in NLR-IDs**

The two main avenues to engineer IDs in NLRs are structure and/or protein–protein interaction-guided mutagenesis or domain swaps. Once new binding affinity is confirmed, the next step is to express engineered sensor, executor, and newly recognized effector in a heterologous system for high-throughput screening. Providing cell death was observed in the presence of the effector, the system can be transferred into crops to test for resistance against pathogen(s), expressing the newly recognized effector. Created in BioRender.com.

## Structure-guided engineering of the integrated HMA domain in Pik-1 and RGA5

The integrated HMA domains of rice NLRs Pik-1 and RGA5 were engineered using structure-guided mutagenesis to expand their recognition spectrum or switch effector specificity. De la Concepcion et al. [60] combined favorable binding interfaces from  $\text{Pikp-1}^{\text{HMA}}/\text{AVR-PikD}$  [14] and  $\text{Pikm-1}^{\text{HMA}}/\text{AVR-PikD}$ , E, A [38] complexes to design a  $\text{Pikp-1}^{\text{HMA}}$  variant able to bind AVR-PikD, E, A, C and trigger HR in the presence of AVR-PikD, E, A in *N. benthamiana* when co-expressed with its executor  $\text{Pikp-2}$ . Cesari et al. [61] engineered  $\text{RGA5}^{\text{HMA}}$  (aka Pia-2<sup>HMA</sup>), recognizing AVR-Pia and AVR1-CO39, to bind AVR-PikD. The authors combined the binding interfaces of  $\text{RGA5}^{\text{HMA}}/\text{AVR1-CO39}$  and  $\text{Pikp-1}^{\text{HMA}}/\text{AVR-PikD}$  into  $\text{RGA5}^{\text{HMA}}$  to design a  $\text{RGA5}^{\text{HMA}}$  variant able to bind AVR-PikD and retain binding to AVR1-CO39 and AVR-Pia. Co-expressing this RGA5 variant with its executor RGA4 in the presence of Avr-PikD, Avr-Pia or AVR1-CO39 triggers HR in *N. benthamiana*. However, the engineered Avr-PikD recognition did not translate into resistance in rice transgenics infected with *M. oryzae* strains expressing this effector. Finally, Liu et al. [62] modified the HMA domain of RGA5 to gain binding to AVR-Pib by comparing

the structure of the RGA5<sup>HMA</sup>/AVR1-CO39 complex to the modelled structure of RGA5<sup>HMA</sup>/Avr-Pib [63]. The engineered RGA5<sup>HMA</sup> lost AVR-Pia binding and recognition and triggers HR in responses to AVR-Pib in the presence of RGA4 in *N. benthamiana*. Additionally, RGA5<sup>HMA</sup> variant/RGA4 conferred resistance against *M. oryzae* expressing AVR-Pib in rice transgenics.

## Integrated domain swap in RRS1R and Pik-1

Effector/host target interactions could provide valuable information on how to engineer new resistance specificities to bait effectors [43,64]. Maidment et al. [64] and Oikawa et al. [65] showed that AVR-Pik variants bind rice proteins containing a HMA domain that is phylogenetically related to the HMA domains integrated in Pik-1 alleles and RGA5. All known AVR-Pik variants bind OsHIP19, including the two variants AVR-PikC and F that are not recognized by any known Pik alleles. The structural information of the OsHIP19/AVR-Pik complexes resolved in the present study could thus inform on HMA domain engineering to expand Pik alleles spectrum of recognition to these AVR-Pik variants. Recently, Wang et al. [66] developed a tripartite system to engineer phytoplasma effector SAP05 recognition by the RRS1/RPS4 system. SAP05 mediates the degradation of its targets SPL and GATA transcription factors by hijacking the 26S plant ubiquitin receptor RPN10 [67]. The authors used an autoactive version of RRS1-R, RRS1-R<sup>slh1</sup>, RPS4, and RRS1-R fused with the GATA domain that is recognized by SAP05 in this system. In the absence of SAP05, RRS1-R<sup>slh1</sup> autoactivity is repressed by RRS1-R-GATA. In the presence of SAP05, RRS1-R-GATA is degraded, re-enabling RRS1-R<sup>slh1</sup> autoactivity that is dependent on RPS4. The tripartite system was able to induce HR in the transient system of *N. benthamiana* in the presence of the SAP05 effector. Transgenic Arabidopsis lines expressing RRS1-R-GATA, RRS1-R<sup>slh1</sup>, and RPS4 showed delayed symptoms in the presence of the pathogens but were not fully resistant, however.

More recently, Kourelis et al. [68] swapped the HMA domain of Pikm-1 for single variable domain heavy chain (VHH) antibodies (or nanobodies) targeting GFP or mCherry. The Pikm-1-Nanobody fusions (Pikobodies) trigger HR in *N. benthamiana* in the presence of Pikm-2 and the corresponding fluorescent protein. Furthermore, Pikobodies conferred resistance against a Potato Virus X variant expressing free GFP or free mCherry. It remains to be shown whether Pikobody-mediated resistance is functional in stable transgenics, however. Given that nanobodies can be raised against virtually any molecule, Pikobodies have the potential to generate resistance against all major plant pathogens and pests secreting effectors in the plant cell.

## Effector binding does not always translate into immunity

Challenges can arise at each step of the NLR editing process (Figure 2). For example, mutations and/or domain swapping can trigger an autoimmune response when transiently expressed in heterologous systems [37,66,69]. Further fine-tuning of the NLR scaffold is often necessary to prevent this. Additionally, even though new binding affinity can be engineered, binding alone does not automatically translate into an immune response (Table 2 and Figure 2). This is especially true when information on the isolated ID in complex with the effector is used to guide engineering, as it is impossible to predict the effect of the mutation(s) in the context of the full-length receptor. Finally, even if there is an immune response in heterologous systems and transient assays, synthetic NLRs might still not be functional in other systems under stable expression (Table 2 and Figure 2). These hurdles are not impossible to overcome, however. The examples of NLR-ID engineering discussed above illustrate that NLRs can tolerate such edits and even function with non-plant domains. Certain NLR scaffolds may be more tolerant than others to domain swapping and/or targeted edits. For example, orthologues across cereals of RGA5 carry different integrated domains at their C-terminus [18]. Could this mean that RGA5 orthologues might accept domain swaps more easily than other NLR scaffolds? This remains to be investigated.

An additional perspective connected to NLR-IDs is the identification of essential host's components that are targeted by pathogens and pests to promote susceptibility. All the identified and studied IDs potentially reflect the original targets of the pathogens at the subcellular level so far. This indicates that these integrated domains can be used as a toolbox toward the identification of the original effector targets in the host cells as well as novel host susceptibility components that could be utilized further [70,71].

## Outlook

Combined with the increasing quality of genome assemblies and annotations available for a wide range of plant species and varieties, NLR discovery pipelines [72–74], improved protocols for crop transformation [75,76], and shorter generation times [77,78] and synthetic NLRs will be a valuable addition to our toolkit to design future crops. While developing new resistance specificities might be facilitated in the future, synthetic NLRs will face the same issue as



any dominant resistant genes deployed as a single unit. Stewardship plans will thus need to be in place to deploy synthetic NLRs in combination and/or rotation with other resistance genes to prevent rapid resistance breakdown. Additionally, diagnostic methods such as field pathogenomics [79,80] or Marple [81] can identify pathogen isolates causing outbreaks and thus inform targeted engineering of new resistances.

## Summary

- NLR-IDs are present across the plant kingdom.
- Functional studies showed that these extra domains are involved in direct or indirect effector recognition.
- Most functionally characterized NLR-IDs work in pairs.
- It is still unclear how NLR-IDs are activated upon effector recognition.
- Integrated domains in NLRs can be engineered to expand or modify their spectrum of effector recognition.

## Competing Interests

The authors declare that there are no competing interests associated with the manuscript.

## Author Contribution

Conceptualization: C.M., P.F.S., V.C.; Writing initial draft: C.M., V.A.M., Z.Z., V.C., P.F.S.; Editing: C.M., P.F.S., V.C., V.A.M.; Figure: V.A.M., C.M., P.F.S.

## Abbreviations

CC, Coiled-Coil; AVR, AVirulent Factor; HMA, Heavy Metal-Associated; HR, Hypersensitive Response; IDs, Integrated Domains; LRRs, Leucine-Rich Repeats; MAX, *M. oryzae* AVRs and ToxB-like; NAD<sup>+</sup>, Nicotinamide Adenine Dinucleotide; NADase, Nicotinamide Adenine Dinucleotide hydrolase; NB-ARC, Nucleotide Binding domain present in APAF-1 (apoptotic protease-activating factor-1), **R** proteins and CED-4 (Caenorhabditis elegans death-4 protein); NLRs, Nucleotide-binding and Leucine-rich Repeat receptors; NOI, NO<sub>3</sub>-Induced; RPW8, Resistance to Powdery Mildew 8; TIR, Toll/Interleukin-1 Receptor; TNL, TIR-containing NLR; VHH, single variable domain heavy chain; WRKY TFs, WRKY Transcription Factors; GFP, Green Fluorescent Protein; MHD, Methionine (M)-Histidine (H)-Aspartate (D) motif.

## References

- 1 Jones, J.D.G. and Dangl, J.L. (2006) The plant immune system. *Nature* **444**, 323–329, <https://doi.org/10.1038/nature05286>
- 2 Duxbury, Z., Wu, C. and Ding, P. (2021) A comparative overview of the intracellular guardians of plants and animals: NLRs in innate immunity and beyond. *Annu. Rev. Plant Biol.* **72**, 155–184, <https://doi.org/10.1146/annurev-arplant-080620-104948>
- 3 Meyers, B.C., Kozik, A., Griego, A., Kuang, H. and Michelmore, R.W. (2003) Genome-wide analysis of NBS-LRR-encoding genes in Arabidopsis. *Plant Cell*. **15**, 809–834, <https://doi.org/10.1105/tpc.009308>
- 4 Cesari, S. (2018) Multiple strategies for pathogen perception by plant immune receptors. *New Phytol.* **219**, 17–24, <https://doi.org/10.1111/nph.14877>
- 5 Kourelis, J. and Van Der Hoorn, R.A.L. (2018) Defended to the nines: 25 years of resistance gene cloning identifies nine mechanisms for R protein function. *Plant Cell*. **30**, 285–299, <https://doi.org/10.1105/tpc.17.00579>
- 6 Adachi, H., Derevnina, L. and Kamoun, S. (2019) NLR singletons, pairs, and networks: evolution, assembly, and regulation of the intracellular immunoreceptor circuitry of plants. *Curr. Opin. Plant Biol.* **50**, 121–131, <https://doi.org/10.1016/j.pbi.2019.04.007>
- 7 Wu, C.-H., Derevnina, L. and Kamoun, S. (2018) Receptor networks underpin plant immunity. *Science* **360**, 1300–1301, <https://doi.org/10.1126/science.aat2623>
- 8 Saile, S.C., Jacob, P., Castel, B., Jubic, L.M., Salas-Gonzalez, I., Bäcker, M. et al. (2020) Two unequally redundant ‘helper’ immune receptor families mediate Arabidopsis thaliana intracellular ‘sensor’ immune receptor functions. *PLoS Biol.* **18**, 1–28, <https://doi.org/10.1371/journal.pbio.3000783>
- 9 Castel, B., Ngou, P.M., Cevik, V., Redkar, A., Kim, D.S., Yang, Y. et al. (2019) Diverse NLR immune receptors activate defence via the RPW8-NLR NRG1. *New Phytol.* **222**, 966–980, <https://doi.org/10.1111/nph.15659>
- 10 Sarris, P.F., Cevik, V., Dagdas, G., Jones, J.D.G. and Krasileva, K.V. (2016) Comparative analysis of plant immune receptor architectures uncovers host proteins likely targeted by pathogens. *BMC Biol.* **14**, 8, <https://doi.org/10.1186/s12915-016-0228-7>

- 11 Kroj, T., Chanclud, E., Michel-Romiti, C., Grand, X. and Morel, J.-B. (2016) Integration of decoy domains derived from protein targets of pathogen effectors into plant immune receptors is widespread. *New Phytol.* **210**, 618–626, <https://doi.org/10.1111/nph.13869>
- 12 Sarris, P.F., Duxbury, Z., Huh, S.U., Ma, Y., Segonzac, C., Sklenar, J. et al. (2015) A plant immune receptor detects pathogen effectors that target WRKY transcription factors. *Cell* **161**, 1089–1100, <https://doi.org/10.1016/j.cell.2015.04.024>
- 13 Le Roux, C., Huet, G., Jauneau, A., Camborde, L., Tremousaygue, D., Kraut, A. et al. (2015) A receptor pair with an integrated decoy converts pathogen disabling of transcription factors to immunity. *Cell* **161**, 1074–1088, <https://doi.org/10.1016/j.cell.2015.04.025>
- 14 Maqbool, A., Saitoh, H., Franceschetti, M., Stevenson, C.E.M., Uemura, A., Kanzaki, H. et al. (2015) Structural basis of pathogen recognition by an integrated HMA domain in a plant NLR immune receptor. *Elife* **4**, <https://doi.org/10.7554/eLife.08709>
- 15 Fujisaki, K., Abe, Y., Kanzaki, E., Ito, K., Utsushi, H., Saitoh, H. et al. (2017) An unconventional NOI/RIN4 domain of a rice NLR protein binds host EXO70 protein to confer fungal immunity. *bioRxiv*, <https://doi.org/10.1101/239400>
- 16 Cesari, S., Thilliez, G., Ribot, C., Chalvon, V., Michel, C., Jauneau, A. et al. (2013) The rice resistance protein pair RGA4/RGA5 recognizes the *Magnaporthe oryzae* effectors AVR-Pia and AVR1-CO39 by direct binding. *Plant Cell*. **25**, 1463–1481, <https://doi.org/10.1105/tpc.112.107201>
- 17 Cesari, S., Bernoux, M., Moncuquet, P., Kroj, T. and Dodds, P.N. (2014) A novel conserved mechanism for plant NLR protein pairs: the ‘integrated decoy’ hypothesis. *Front. Plant Sci.* **5**, 10, <https://doi.org/10.3389/fpls.2014.00606>
- 18 Bailey, P.C., Schudoma, C., Jackson, W., Baggs, E., Dagdas, G., Haerty, W. et al. (2018) Dominant integration locus drives continuous diversification of plant immune receptors with exogenous domain fusions. *Genome Biol.* **19**, 23, <https://doi.org/10.1186/s13059-018-1392-6>
- 19 Stein, J.C., Yu, Y., Copetti, D., Zwickl, D.J., Zhang, L., Zhang, C. et al. (2018) Genomes of 13 domesticated and wild rice relatives highlight genetic conservation, turnover and innovation across the genus *Oryza*. *Nat. Genet.* **50**, 285–296, <https://doi.org/10.1038/s41588-018-0040-0>
- 20 Marchal, C., Haberer, G., Spannagl, M. and Uauy, C. (2020) Comparative genomics and functional studies of wheat BED-NLR loci. *Genes (Basel)* **11**, 1–28, <https://doi.org/10.3390/genes11121406>
- 21 Wang, H., Zou, S., Li, Y., Lin, F. and Tang, D. (2020) An ankyrin-repeat and WRKY-domain-containing immune receptor confers stripe rust resistance in wheat. *Nat. Commun.* **11**, 1–11
- 22 Das, B., Sengupta, S., Prasad, M. and Ghose, T.K. (2014) Genetic diversity of the conserved motifs of six bacterial leaf blight resistance genes in a set of rice landraces. *BMC Genet.* **15**, 82, <https://doi.org/10.1186/1471-2156-15-82>
- 23 Read, A.C., Hutin, M., Moscou, M.J., Rinaldi, F.C. and Bogdanove, A.J. (2020) Cloning of the Rice *Xo1* resistance gene and interaction of the *Xo1* protein with the defense-suppressing *Xanthomonas* Effector Tal2h. *Mol. Plant-Microbe Interact.* **33**, 1189–1195, <https://doi.org/10.1094/MPMI-05-20-0131-SC>
- 24 Yuan, B., Zhai, C., Wang, W., Zeng, X., Xu, X., Hu, H. et al. (2011) The *Pik-p* resistance to *Magnaporthe oryzae* in rice is mediated by a pair of closely linked CC-NBS-LRR genes. *Theor. Appl. Genet.* **122**, 1017–1028, <https://doi.org/10.1007/s00122-010-1506-3>
- 25 Ashikawa, I., Hayashi, N., Yamane, H., Kanamori, H., Wu, J., Matsumoto, T. et al. (2008) Two adjacent nucleotide-binding site-leucine-rich repeat class genes are required to confer *Pikm*-specific rice blast resistance. *Genetics* **180**, 2267–2276, <https://doi.org/10.1534/genetics.108.095034>
- 26 Deslandes, L., Olivier, J., Peeters, N., Feng, D.X., Khounlotham, M., Boucher, C. et al. (2003) Physical interaction between RRS1-R, a protein conferring resistance to bacterial wilt, and PopP2, a type III effector targeted to the plant nucleus. *Proc. Natl. Acad. Sci. U. S. A.* **100**, 8024–8029, <https://doi.org/10.1073/pnas.1230660100>
- 27 Narusaka, M., Shirasu, K., Noutoshi, Y., Kubo, Y., Shiraishi, T., Iwabuchi, M. et al. (2009) *RRS1* and *RPS4* provide a dual *Resistance-* gene system against fungal and bacterial pathogens. *Plant J.* **60**, 218–226, <https://doi.org/10.1111/j.1365-313X.2009.03949.x>
- 28 Williams, S.J., Sohn, K.H., Wan, L., Bernoux, M., Sarris, P.F., Segonzac, C. et al. (2014) Structural basis for assembly and function of a heterodimeric plant immune receptor. *Science* **344**, 299–303, <https://doi.org/10.1126/science.1247357>
- 29 Gassmann, W., Hinsch, M.E. and Staskawicz, B.J. (1999) The Arabidopsis *RPS4* bacterial-resistance gene is a member of the TIR-NBS-LRR family of disease-resistance genes. *Plant J.* **20**, 265–277, <https://doi.org/10.1046/j.1365-313X.1999.t01-1-00600.x>
- 30 de Guillen, K., Ortiz-Vallejo, D., Gracy, J., Fournier, E., Kroj, T. and Padilla, A. (2015) Structure analysis uncovers a highly diverse but structurally conserved effector family in phytopathogenic fungi. *PLoS Pathog.* **11**, <https://doi.org/10.1371/journal.ppat.1005228>
- 31 Ortiz, D., de Guillen, K., Cesari, S., Chalvon, V., Gracy, J., Padilla, A. et al. (2017) Recognition of the *magnaporthe oryzae* effector AVR-pia by the decoy domain of the rice NLR immune receptor RGA5. *Plant Cell*. **29**, 156–168, <https://doi.org/10.1105/tpc.16.00435>
- 32 Guo, L., Cesari, S., de Guillen, K., Chalvon, V., Mammri, L., Ma, M. et al. (2018) Specific recognition of two MAX effectors by integrated HMA domains in plant immune receptors involves distinct binding surfaces. *Proc. Natl. Acad. Sci. U. S. A.* **115**, 11637–11642, <https://doi.org/10.1073/pnas.1810705115>
- 33 Césari, S., Kanzaki, H., Fujiwara, T., Bernoux, M., Chalvon, V., Kawano, Y. et al. (2014) The NB - LRR proteins RGA 4 and RGA 5 interact functionally and physically to confer disease resistance. *EMBO J.* **33**, 1941–1959, <https://doi.org/10.15252/embj.201487923>
- 34 Okuyama, Y., Kanzaki, H., Abe, A., Yoshida, K., Tamiru, M., Saitoh, H. et al. (2011) A multifaceted genomics approach allows the isolation of the rice *Pia*-blast resistance gene consisting of two adjacent NBS-LRR protein genes. *Plant J.* **66**, 467–479, <https://doi.org/10.1111/j.1365-313X.2011.04502.x>
- 35 Yoshida, K., Saitoh, H., Fujisawa, S., Kanzaki, H., Matsumura, H., Yoshida, K. et al. (2009) Association genetics reveals three novel avirulence genes from the rice blast fungal pathogen *Magnaporthe oryzae*. *Plant Cell Online* **21**, 1573–1591, <https://doi.org/10.1105/tpc.109.066324>
- 36 Kanzaki, H., Yoshida, K., Saitoh, H., Fujisaki, K., Hirabuchi, A., Alaux, L. et al. (2012) Arms race co-evolution of *Magnaporthe oryzae* AVR-Pik and rice *Pik* genes driven by their physical interactions. *Plant J.* **72**, 894–907, <https://doi.org/10.1111/j.1365-313X.2012.05110.x>
- 37 Bialas, A., Langner, T., Harant, A., Contreras, M.P., Stevenson, C.E., Lawson, D.M. et al. (2021) Two NLR immune receptors acquired high-affinity binding to a fungal effector through convergent evolution of their integrated domain. *Elife* **10**, <https://doi.org/10.7554/eLife.66961>
- 38 De la Concepcion, J.C., Franceschetti, M., Maqbool, A., Saitoh, H., Terauchi, R., Kamoun, S. et al. (2018) Polymorphic residues in rice NLRs expand binding and response to effectors of the blast pathogen. *Nat. Plants* **4**, 576–585, <https://doi.org/10.1038/s41477-018-0194-x>

- 39 Zdrzalek, R., Kamoun, S., Terauchi, R., Saitoh, H. and Banfield, M.J. (2020) The rice NLR pair Pk1p-1/Pk1p-2 initiates cell death through receptor cooperation rather than negative regulation. *PLoS ONE* **15**, <https://doi.org/10.1371/journal.pone.0238616>
- 40 Hinsch, M. and Staskawicz, B. (1996) Identification of a new Arabidopsis disease resistance locus, RPS4, and cloning of the corresponding avirulence gene, avrRps4, from *Pseudomonas syringae* pv. pisi. *Mol. Plant. Microbe. Interact.* **9**, 55–61, <https://doi.org/10.1094/MPMI-9-0055>
- 41 Narusaka, M., Hatakeyama, K., Shirasu, K. and Narusaka, Y. (2014) Arabidopsis dual resistance proteins, both RPS4 and RRS1, are required for resistance to bacterial wilt in transgenic Brassica crops. *Plant Signal Behav.* **9**, e29130, <https://doi.org/10.4161/psb.29130>
- 42 Saucet, S.B., Ma, Y., Sarris, P.F., Furzer, O.J., Sohn, K.H. and Jones, J.D.G. (2015) Two linked pairs of Arabidopsis TNL resistance genes independently confer recognition of bacterial effector AvrRps4. *Nat. Commun.* **6**, 6338, <https://doi.org/10.1038/ncomms7338>
- 43 Mukhi, N., Brown, H., Gorenkin, D., Ding, P., Bentham, A.R., Stevenson, C.E.M. et al. (2021) Perception of structurally distinct effectors by the integrated WRKY domain of a plant immune receptor. *Proc. Natl. Acad. Sci. U. S. A.* **118**, <https://doi.org/10.1073/pnas.2113996118>
- 44 Zhang, Z.M., Ma, K.W., Gao, L., Hu, Z., Schwizer, S., Ma, W. et al. (2017) Mechanism of host substrate acetylation by a YopJ family effector. *Nat. Plants* **3**, 17115, <https://doi.org/10.1038/nplants.2017.115>
- 45 Ma, Y., Guo, H., Hu, L., Martinez, P.P., Moschou, P.N., Cevik, V. et al. (2018) Distinct modes of derepression of an Arabidopsis immune receptor complex by two different bacterial effectors. *Proc. Natl. Acad. Sci. U. S. A.* **115**, 10218–10227, <https://doi.org/10.1073/pnas.1811858115>
- 46 Guo, H., Ahn, H.K., Sklenar, J., Huang, J., Ma, Y., Ding, P. et al. (2020) Phosphorylation-regulated activation of the Arabidopsis RRS1-R/RPS4 immune receptor complex reveals two distinct effector recognition mechanisms. *Cell Host Microbe* **27**, 769–781, <https://doi.org/10.1016/j.chom.2020.03.008>
- 47 Martin, R., Qi, T., Zhang, H., Liu, F., King, M., Toth, C. et al. (2020) Structure of the activated ROQ1 resistosome directly recognizing the pathogen effector XopQ. *Science* **370**, <https://doi.org/10.1126/science.abd9993>
- 48 Ma, S., Lapin, D., Liu, L., Sun, Y., Song, W., Zhang, X. et al. (2020) Direct pathogen-induced assembly of an NLR immune receptor complex to form a holoenzyme. *Science* **370**, <https://doi.org/10.1126/science.abe3069>
- 49 Guo, H., Wang, S. and Jones, J.D.G. (2021) Autoactive Arabidopsis RPS4 alleles require partner protein RRS1-R. *Plant Physiol.* **185**, 761–764, <https://doi.org/10.1093/plphys/kiab076>
- 50 van Ooijen, G., Mayr, G., Kasiem, M.M.A., Albrecht, M., Cornelissen, B.J.C. and Takken, F.L.W. (2008) Structure-function analysis of the NB-ARC domain of plant disease resistance proteins. *J. Exp. Bot.* **59**, 1383–1397, <https://doi.org/10.1093/jxb/ern045>
- 51 Bendahmane, A., Farnham, G., Moffett, P. and Baulcombe, D.C. (2002) Constitutive gain-of-function mutants in a nucleotide binding site-leucine rich repeat protein encoded at the Rx locus of potato. **32**, 195–204
- 52 Wang, J., Hu, M., Wang, J., Qi, J., Han, Z., Wang, G. et al. (2019) Reconstitution and structure of a plant NLR resistosome conferring immunity. *Science* **364**, <https://doi.org/10.1126/science.aav5870>
- 53 Wang, J.J., Wang, J.J., Hu, M., Wu, S., Qi, J., Wang, G. et al. (2019) Ligand-triggered allosteric ADP release primes a plant NLR complex. *Science* **364**, <https://doi.org/10.1126/science.aav5868>
- 54 Meunier, E. and Broz, P. (2017) Evolutionary Convergence and Divergence in NLR Function and Structure. *Trends Immunol.* **10**, 744–757, <https://doi.org/10.1016/j.it.2017.04.005>
- 55 Duxbury, Z., Ma, Y., Furzer, O.J., Huh, S.U., Cevik, V., Jones, J.D.G. et al. (2016) Pathogen perception by NLRs in plants and animals: parallel worlds. *Bioessays* **38**, 769–781, <https://doi.org/10.1002/bies.201600046>
- 56 Bentham, A., Burdett, H., Anderson, P.A., Williams, S.J. and Kobe, B. (2017) Animal NLRs provide structural insights into plant NLR function. *Ann. Bot.* **119**, 698–702
- 57 Mermigka, G., Amprazi, M., Mentzelopoulou, A., Amartolou, A. and Sarris, P.F. (2020) Plant and animal innate immunity complexes: fighting different enemies with similar weapons. *Trends Plant Sci.* **25**, 80–91, <https://doi.org/10.1016/j.tplants.2019.09.008>
- 58 Hu, Z., Zhou, Q., Zhang, C., Fan, S., Cheng, W., Zhao, Y. et al. (2015) Structural and biochemical basis for induced self-propagation of NLRC4. *Science* **350**, 399–404, <https://doi.org/10.1126/science.aac5489>
- 59 Zhang, L., Chen, S., Ruan, J., Wu, J., Tong, A.B., Yin, Q. et al. (2015) Cryo-EM structure of the activated NAIP2-NLRC4 inflammasome reveals nucleated polymerization. *Science* **350**, 404–409, <https://doi.org/10.1126/science.aac5789>
- 60 De La Concepcion, J.C., Franceschetti, M., Maclean, D., Terauchi, R., Kamoun, S. and Banfield, M.J. (2019) Protein engineering expands the effector recognition profile of a rice NLR immune receptor. *Elife* **8**, <https://doi.org/10.7554/eLife.47713>
- 61 Cesari, S., Xi, Y., Declerck, N., Chalvon, V., Mammari, L., Pugnère, M. et al. (2021) Design of a new effector recognition specificity in a plant NLR immune receptor by molecular engineering of its integrated decoy domain. *bioRxiv*, <https://doi.org/10.1101/2021.04.24.441256>
- 62 Liu, Y., Zhang, X., Yuan, G., Wang, D., Zheng, Y., Ma, M. et al. (2021) A designer rice NLR immune receptor confers resistance to the rice blast fungus carrying noncorresponding avirulence effectors. *Proc. Natl. Acad. Sci.* **118**, <https://doi.org/10.1073/pnas.2110751118>
- 63 Zhang, X., He, D., Zhao, Y., Cheng, X., Zhao, W., Taylor, I.A. et al. (2018) A positive-charged patch and stabilized hydrophobic core are essential for avirulence function of AvrPib in the rice blast fungus. *Plant J.* **96**, 133–146, <https://doi.org/10.1111/tpj.14023>
- 64 Maidment, J.H.R., Franceschetti, M., Maqbool, A., Saitoh, H., Jantasuriyarat, C., Kamoun, S. et al. (2021) Multiple variants of the fungal effector AVR-Pik bind the HMA domain of the rice protein OsHIPP19, providing a foundation to engineer plant defense. *J. Biol. Chem.* **296**, <https://doi.org/10.1016/j.jbc.2021.100371>
- 65 Oikawa, K., Fujisaki, K., Shimizu, M., Takeda, T., Saitoh, H., Hirabuchi, A. et al. (2020) The blast pathogen effector AVR-Pik binds and stabilizes rice heavy metal-associated (HMA) proteins to co-opt their function in immunity. *bioRxiv*, <https://doi.org/10.1101/2020.12.01.406389>
- 66 Wang, S., Huang, W., Duxbury, Z., Hogenhout, S.A. and Jones, J.D.G. (2021) Novel effector recognition capacity engineered into a paired NLR complex. *bioRxiv*, <https://doi.org/10.1101/2021.09.06.459143>
- 67 Huang, W., MacLean, A.M., Sugio, A., Maqbool, A., Busscher, M., Cho, S.T. et al. (2021) Parasitic modulation of host development by ubiquitin-independent protein degradation. *Cell* **184**, 5201.e12–5214.e12, <https://doi.org/10.1016/j.cell.2021.08.029>

- 68 Kourelis, J., Marchal, C. and Kamoun, S. (2021) NLR immune receptor-nanobody fusions confer plant disease resistance. *bioRxiv*, <https://doi.org/10.1101/2021.10.24.465418>
- 69 De La Concepcion, J.C., Benjumea, J.V., Bialas, A., Terauchi, R., Kamoun, S. and Banfield, M.J. (2021) Functional diversification gave rise to allelic specialization in a rice NLR immune receptor pair. *Elife* **10**
- 70 Michalopoulou, V.A., Kotsaridis, K., Mermigka, G., Kotsifaki, D., Kokkinidis, M., Celie, P.H.N. et al. (2020) The host exocyst complex is targeted by a conserved bacterial type III effector protein that promotes virulence. *bioRxiv*, <https://doi.org/10.1101/2020.11.06.371260>
- 71 Landry, D., Mila, I., Raja, C., Sabbagh, R., Zaffuto, M., Pouzet, C. et al. (2021) An NLR integrated domain toolkit to identify plant pathogen effector targets. *bioRxiv*
- 72 Jupe, F., Witek, K., Verweij, W., Sliwka, J., Pritchard, L., Etherington, G.J. et al. (2013) Resistance gene enrichment sequencing (RenSeq) enables reannotation of the NB-LRR gene family from sequenced plant genomes and rapid mapping of resistance loci in segregating populations. *Plant J.* **76**, 530–544, <https://doi.org/10.1111/tpj.12307>
- 73 Steuernagel, B., Periyannan, S.K., Hernández-Pinzón, I., Witek, K., Rouse, M.N., Yu, G. et al. (2016) Rapid cloning of disease-resistance genes in plants using mutagenesis and sequence capture. *Nat. Biotechnol.* **34**, 652–655, <https://doi.org/10.1038/nbt.3543>
- 74 Arora, S., Steuernagel, B., Gaurav, K., Chandramohan, S., Long, Y., Matny, O. et al. (2019) Resistance gene cloning from a wild crop relative by sequence capture and association genetics. *Nat. Biotechnol.* **37**, 139–143, <https://doi.org/10.1038/s41587-018-0007-9>
- 75 Kelliher, T., Starr, D., Su, X., Tang, G., Chen, Z., Carter, J. et al. (2019) One-step genome editing of elite crop germplasm during haploid induction. *Nat. Biotechnol.* **37**, 287–292, <https://doi.org/10.1038/s41587-019-0038-x>
- 76 Debernardi, J.M., Tricoli, D.M., Ercoli, M.F., Hayta, S., Ronald, P., Palatnik, J.F. et al. (2020) A GRF-GIF chimeric protein improves the regeneration efficiency of transgenic plants. *Nat. Biotechnol.* **38**, 1274–1279, <https://doi.org/10.1038/s41587-020-0703-0>
- 77 Watson, A., Ghosh, S., Williams, M.J., Cuddy, W.S., Simmonds, J., Rey, M.-D. et al. (2018) Speed breeding is a powerful tool to accelerate crop research and breeding. *Nat. Plants* **4**, 23–29, <https://doi.org/10.1038/s41477-017-0083-8>
- 78 Ghosh, S., Watson, A., Gonzalez-Navarro, O.E., Ramirez-Gonzalez, R.H., Yanes, L., Mendoza-Suárez, M. et al. (2018) Speed breeding in growth chambers and glasshouses for crop breeding and model plant research. *Nature Protocols* **13**, 2944–2963
- 79 Hubbard, A., Lewis, C.M., Yoshida, K., Ramirez-Gonzalez, R.H., de Vallaville-Pope, C., Thomas, J. et al. (2015) Field pathogenomics reveals the emergence of a diverse wheat yellow rust population. *Genome Biol.* **16**, 23, <https://doi.org/10.1186/s13059-015-0590-8>
- 80 Bueno-Sancho, V., Bunting, D.C.E., Yanes, L.J., Yoshida, K. and Saunders, D.G.O. (2017) Field pathogenomics: an advanced tool for wheat rust surveillance. In *Wheat Rust Diseases: Methods and Protocols* (Periyannan, S., ed.), pp. 13–28, Springer New York, New York, NY
- 81 Radhakrishnan, G.V., Cook, N.M., Bueno-Sancho, V., Lewis, C.M., Persoons, A., Mitiku, A.D. et al. (2019) MARPLE, a point-of-care, strain-level disease diagnostics and surveillance tool for complex fungal pathogens. *BMC Biol.* **17**, 65, <https://doi.org/10.1186/s12915-019-0684-y>
- 82 Kourelis, J., Sakai, T., Adachi, H. and Kamoun, S. (2021) ReffPlantNLR is a comprehensive collection of experimentally validated plant disease resistance proteins from the NLR family. *PLoS Biol.* **19**, 124, <https://doi.org/10.1371/journal.pbio.3001124>
- 83 Nicolis, V. and Venter, E. (2018) Silencing of a unique integrated domain nucleotide-binding leucine-rich repeat gene in wheat abolishes Diuraphis noxia resistance. *Mol. Plant. Microbe. Interact.* **31**, 940–950, <https://doi.org/10.1094/MPMI-11-17-0262-R>
- 84 Mermigka, G., Amartolou, A., Mentzelopoulou, A., Astropokaki, N. and Sarris, P.F. (2021) Assassination tango: an NLR/NLR-ID immune receptors pair of rapeseed co-operates inside the nucleus to activate cell death. *bioRxiv*, <https://doi.org/10.1101/2021.10.29.466428>
- 85 Bi, D., Johnson, K.C.M., Zhu, Z., Huang, Y., Chen, F., Zhang, Y. et al. (2011) Mutations in an atypical TIR-NB-LRR-LIM resistance protein confer autoimmunity. *Front. Plant Sci.* **2**, 71, <https://doi.org/10.3389/fpls.2011.00071>
- 86 Xu, F., Zhu, C., Cevik, V., Johnson, K., Liu, Y., Sohn, K. et al. (2015) Autoimmunity conferred by chs3-2D relies on CSA1, its adjacent TNL-encoding neighbour. *Sci. Rep.* **5**, 1–7
- 87 Li, Y., Zheng, L., Corke, F., Smith, C. and Bevan, M.W. (2008) Control of final seed and organ size by the DA1 gene family in Arabidopsis thaliana. *Genes Dev.* **22**, 1331–1336, <https://doi.org/10.1101/gad.463608>
- 88 Andersen, E.J., Nepal, M.P., Purintun, J.M., Nelson, D., Mermigka, G. and Sarris, P.F. (2020) Wheat disease resistance genes and their diversification through integrated domain fusions. *Front. Genet.* **11**, 1–15, <https://doi.org/10.3389/fgene.2020.00898>
- 89 Hua, L., Wu, J., Chen, C., Wu, W., He, X., Lin, F. et al. (2012) The isolation of Pi1, an allele at the Pik locus which confers broad spectrum resistance to rice blast. *TAG Theor. Appl. Genet.* **125**, 1047–1055, <https://doi.org/10.1007/s00122-012-1894-7>
- 90 Lee, S.-K., Song, M.-Y., Seo, Y.-S., Kim, H.-K., Ko, S., Cao, P.-J. et al. (2009) Rice Pi5-mediated resistance to Magnaporthe oryzae requires the presence of two coiled-coil-nucleotide-binding-leucine-rich repeat genes. *Genetics* **181**, 1627–1638, <https://doi.org/10.1534/genetics.108.099226>
- 91 Chaipanya, C., Teleanco-Yanoria, M.J., Quime, B., Longya, A., Korinsak, S., Korinsak, S. et al. (2017) Dissection of broad-spectrum resistance of the Thai rice variety Jao Hom Nin conferred by two resistance genes against rice blast. *Rice (N Y)* **10**, 18, <https://doi.org/10.1186/s12284-017-0159-0>
- 92 Takagi, H., Abe, A., Uemura, A., Oikawa, K., Utsushi, H., Yaegashi, H. et al. (2017) Rice blast resistance gene Pii is controlled by a pair of NBS-LRR genes Pii-1 and Pii-2. *bioRxiv*, <https://doi.org/10.1101/227132>
- 93 Zhai, C., Lin, F., Dong, Z., He, X., Yuan, B., Zeng, X. et al. (2011) The isolation and characterization of Pik, a rice blast resistance gene which emerged after rice domestication. *New Phytol.* **189**, 321–334, <https://doi.org/10.1111/j.1469-8137.2010.03462.x>
- 94 Chen, J., Peng, P., Tian, J., He, Y., Zhang, L., Liu, Z. et al. (2015) Pike, a rice blast resistance allele consisting of two adjacent NBS-LRR genes, was identified as a novel allele at the Pik locus. *Mol. Breed* **35**, <https://doi.org/10.1007/s11032-015-0305-6>
- 95 Zhai, C., Zhang, Y., Yao, N., Lin, F., Liu, Z., Dong, Z. et al. (2014) Function and interaction of the coupled genes responsible for Pik-h encoded rice blast resistance. *PLoS ONE* **9**, <https://doi.org/10.1371/journal.pone.0098067>
- 96 Ashikawa, I., Hayashi, N., Yamane, H., Kanamori, H., Wu, J., Matsumoto, T. et al. (2008) Two adjacent nucleotide-binding site-leucine-rich repeat class genes are required to confer Pikm-specific rice blast resistance. *Genetics* **180**, 2267–2276, <https://doi.org/10.1534/genetics.108.095034>

- 97 Ariya-anandech, K., Chaipanya, C., Teerasan, W., Kate-Ngam, S. and Jantassuriyarat, C. (2018) Detection and allele identification of rice blast resistance gene, Pik, in Thai rice germplasm. *Agric Nat. Resour.* **52**, 525–535, <https://doi.org/10.1016/j.anres.2018.11.009>
- 98 Liu, M.-H., Kang, H., Xu, Y., Peng, Y., Wang, D., Gao, L. et al. (2020) Genome-wide association study identifies an NLR gene that confers partial resistance to *Magnaporthe oryzae* in rice. *Plant Biotechnol. J.* **18**, 1376–1383, <https://doi.org/10.1111/pbi.13300>
- 99 Bryan, G.T., Wu, K.S., Farrall, L., Jia, Y., Hershey, H.P., McAdams, S.A. et al. (2000) tA single amino acid difference distinguishes resistant and susceptible alleles of the rice blast resistance gene Pi-ta. *Plant Cell.* **12**, 2033–2046
- 100 Periyannan, S., Moore, J., Ayliffe, M., Bansal, U., Wang, X., Huang, L. et al. (2013) The gene Sr33, an ortholog of barley Mla genes, encodes resistance to wheat stem rust race Ug99. *Science* **341**, 786–788, <https://doi.org/10.1126/science.1239028>
- 101 Brabham, H.J., Hernández-Pinzón, I., Holden, S., Lorang, J. and Moscou, M.J. (2018) An ancient integration in a plant NLR is maintained as a trans-species polymorphism. *bioRxiv*, <https://doi.org/10.1101/239541>
- 102 Staal, J., Kaliff, M., Dewaele, E., Persson, M. and Dixelius, C. (2008) RLM3, a TIR domain encoding gene involved in broad-range immunity of Arabidopsis to necrotrophic fungal pathogens. *Plant J.* **55**, 188–200, <https://doi.org/10.1111/j.1365-313X.2008.03503.x>
- 103 Nirmala, J., Brueggeman, R., Maier, C., Clay, C., Rostoks, N., Kannangara, C.G. et al. (2006) Subcellular localization and functions of the barley stem rust resistance receptor-like serine/threonine-specific protein kinase Rpp1. *Proc. Natl. Acad. Sci. U. S. A.* **103**, 7518–7523, <https://doi.org/10.1073/pnas.0602379103>
- 104 Brueggeman, R., Druka, A., Nirmala, J., Cavilleer, T., Drader, T., Rostoks, N. et al. (2008) The stem rust resistance gene Rpp5 encodes a protein with nucleotide-binding-site, leucine-rich, and protein kinase domains. *Proc. Natl. Acad. Sci. U. S. A.* **105**, 14970–14975, <https://doi.org/10.1073/pnas.0807270105>
- 105 Arora, D., Gross, T. and Brueggeman, R. (2013) Allele characterization of genes required for rpp4-mediated wheat stem rust resistance identifies Rpp5 as the R gene. *Phytopathology* **103**, 1153–1161, <https://doi.org/10.1094/PHYTO-01-13-0030-R>
- 106 Chen, C., Jost, M., Clark, B., Martin, M., Matny, O., Steffenson, B.J. et al. (2021) BED-domain-containing NLR from wild barley confers resistance to leaf rust. *Plant Biotechnol. J.* **19**, 1206–1215, <https://doi.org/10.1111/pbi.13542>
- 107 Pedley, K.F., Pandey, A.K., Ruck, A., Lincoln, L.M., Whitham, S.A. and Graham, M.A. (2019) Rpp1 encodes a ULP1-NBS-LRR protein that controls immunity to *Phakopsora pachyrhizi* in soybean. *Mol. Plant-Microbe Interact.* **32**, 120–133, <https://doi.org/10.1094/MPMI-07-18-0198-FI>
- 108 Sinapidou, E., Williams, K., Nott, L., Bahkt, S., Tör, M., Crute, I. et al. (2004) Two TIR:NB:LRR genes are required to specify resistance to *Peronospora parasitica* isolate Cala2 in Arabidopsis. *Plant J.* **38**, 898–909, <https://doi.org/10.1111/j.1365-313X.2004.02099.x>
- 109 Deslandes, L., Olivier, J., Theulieries, F., Hirsch, J., Feng, D.X., Bittner-Eddy, P. et al. (2002) Resistance to *Ralstonia solanacearum* in Arabidopsis thaliana is conferred by the recessive RRS1-R gene, a member of a novel family of resistance genes. *Proc. Natl. Acad. Sci. U. S. A.* **99**, 2404–2409, <https://doi.org/10.1073/pnas.032485099>
- 110 Noutoshi, Y., Ito, T., Seki, M., Nakashita, H., Yoshida, S., Marco, Y. et al. (2005) A single amino acid insertion in the WRKY domain of the Arabidopsis TIR-NBS-LRR-WRKY-type disease resistance protein SLH1 (sensitive to low humidity 1) causes activation of defense responses and hypersensitive cell death. *Plant J.* **43**, 873–888, <https://doi.org/10.1111/j.1365-313X.2005.02500.x>
- 111 Deslandes, L., Pileur, F., Liaubet, L., Camut, S., Can, C., Williams, K. et al. (1998) Genetic characterization of RRS1, a recessive locus in Arabidopsis thaliana that confers resistance to the bacterial soilborne pathogen *Ralstonia solanacearum*. *Mol. Plant. Microbe. Interact.* **11**, 659–667, <https://doi.org/10.1094/MPMI.1998.11.7.659>
- 112 Wang, X., Zhang, H., Nyamesorto, B., Luo, Y., Mu, X., Wang, F. et al. (2020) A new mode of NPR1 action via an NB-ARC-NPR1 fusion protein negatively regulates the defence response in wheat to stem rust pathogen. *New Phytol.* **228**, 959–972, <https://doi.org/10.1111/nph.16748>
- 113 Faris, J.D., Zhang, Z., Lu, H., Lu, S., Reddy, L., Cloutier, S. et al. (2010) A unique wheat disease resistance-like gene governs effector-triggered susceptibility to necrotrophic pathogens. *Proc. Natl. Acad. Sci. U. S. A.* **107**, 13544–13549, <https://doi.org/10.1073/pnas.1004090107>
- 114 Warmerdam, S., Sterken, M.G., Sukarta, O.C.A., van Schaik, C.C., Oortwijn, M.E.P., Lozano-Torres, J.L. et al. (2020) The TIR-NB-LRR pair DSC1 and WRKY19 contributes to basal immunity of Arabidopsis to the root-knot nematode *Meloidogyne incognita*. *BMC Plant Biol.* **20**, 73, <https://doi.org/10.1186/s12870-020-2285-x>
- 115 Yoshimura, S., Yamanouchi, U., Katayose, Y., Toki, S., Wang, Z.X., Kono, I. et al. (1998) Expression of *Xa1*, a bacterial blight-resistance gene in rice, is induced by bacterial inoculation. *Proc. Natl. Acad. Sci. U. S. A.* **95**, 1663–1668, <https://doi.org/10.1073/pnas.95.4.1663>
- 116 Read, A.C., Moscou, M.J., Zimin, A.V., Perlea, G., Meyer, R.S., Purugganan, M.D. et al. (2020) Genome assembly and characterization of a complex zfBED-NLR gene-containing disease resistance locus in Carolina Gold Select rice with nanopore sequencing. *PLoS Genet.* **16**, <https://doi.org/10.1371/journal.pgen.1008571>
- 117 Marchal, C., Zhang, J., Zhang, P., Fenwick, P., Steuernagel, B., Adamski, N.M. et al. (2018) BED-domain-containing immune receptors confer diverse resistance spectra to yellow rust. *Nat Plants* **4**, 662–668, <https://doi.org/10.1038/s41477-018-0236-4>
